# Supplementary material for: Effect of Spices on the Formation of VOCs in Roasted Mutton Based on GC-MS and Principal Component Analysis
Source: Hindawi journal article supplement (doi:10.1155/2019/8568920), 2019-09-10
Supplement: f1 [file 8568920.f1.doc]

| **Data of Fig 1** | | | | | | | | | |  |
| --- | --- | --- | --- | --- | --- | --- | --- | --- | --- | --- |
| SAMPLE | aldehydes | others | ethers | terpenes | acids and esters | phenols | ketones | alcohols |  | |
| A | 0.67935 | 0.0037 | 0.16728 | 0.0095 | 0.04057 | 0.02365 | 0.02045 | 0.05551 |  | |
| B | 0.07032 | 8.02E-04 | 0.15957 | 0.45692 | 0.06525 | 0.14544 | 0.01347 | 0.08824 |  | |
| C | 0.50594 | 0.08595 | 0.11523 | 0.15841 | 0.03354 | 0.03488 | 0.00845 | 0.0576 |  | |
| D | 0.44435 | 0.01289 | 0.2811 | 0.02877 | 0.05021 | 0.03671 | 0.02109 | 0.12489 |  | |
| E | 0.20886 | 0.01318 | 0.17035 | 0.4138 | 0.03695 | 0.07638 | 0.00746 | 0.07301 |  | |
|  |  |  |  |  |  |  |  |  |  | |
| SAMPLE | quantity | Y（Er±） |  |  |  |  |  |  |  | |
| A | 38 | 2.51661 |  |  |  |  |  |  |  | |
| B | 46 | 1.52753 |  |  |  |  |  |  |  | |
| C | 53 | 1 |  |  |  |  |  |  |  | |
| D | 49 | 1.52753 |  |  |  |  |  |  |  | |
| E | 46 | 2 |  |  |  |  |  |  |  | |
|  |  |  |  |  |  |  |  |  |  | |
|  |  |  |  |  |  |  |  |  |  | |
|  |  |  |  |  |  |  |  |  |  | |

| **Data of Fig 2**  **(b)** | | | | | |
| --- | --- | --- | --- | --- | --- |
|  | sample A | sample B | sample C | sample D | sample E |
| z1 | 38.234 | 0.000 | 0.200 | 13.344 | 3.757 |
| z3 | 1.652 | 1.332 | 0.000 | 1.467 | 0.713 |
| z4 | 0.033 | 0.000 | 0.091 | 0.211 | 0.000 |
| z5 | 0.439 | 0.770 | 0.000 | 1.114 | 0.473 |
| z6 | 0.032 | 0.116 | 0.023 | 0.935 | 0.675 |
| z8 | 2.461 | 0.000 | 0.000 | 1.366 | 0.000 |
| z10 | 0.007 | 0.048 | 0.000 | 0.027 | 0.077 |
| z11 | 0.186 | 0.519 | 0.263 | 0.802 | 0.431 |
| z16 | 0.413 | 0.000 | 0.114 | 0.287 | 0.022 |
| z28 | 1.636 | 0.000 | 0.234 | 0.921 | 0.185 |
| z31 | 0.408 | 0.267 | 0.344 | 0.212 | 0.117 |
| z33 | 0.000 | 0.000 | 0.057 | 0.118 | 0.000 |
| z37 | 0.153 | 0.051 | 0.008 | 0.113 | 0.032 |
| z40 | 0.235 | 0.108 | 0.235 | 0.143 | 0.082 |
| z43 | 0.000 | 0.687 | 0.107 | 0.285 | 0.702 |
| z45 | 0.098 | 0.000 | 0.033 | 0.088 | 0.000 |
| z46 | 3.355 | 0.641 | 1.763 | 3.802 | 0.000 |
| z48 | 0.000 | 0.000 | 0.000 | 0.064 | 0.028 |
| z49 | 6.645 | 11.204 | 4.407 | 9.382 | 5.493 |
| z51 | 0.065 | 0.467 | 0.506 | 0.121 | 0.263 |
| z55 | 2.980 | 2.701 | 1.107 | 1.742 | 0.995 |
| z57 | 0.000 | 1.484 | 0.000 | 0.490 | 0.092 |
| z65 | 0.228 | 3.572 | 0.062 | 0.425 | 0.954 |
| z66 | 0.000 | 0.000 | 0.103 | 0.181 | 0.000 |
| z67 | 0.000 | 3.742 | 7.022 | 0.000 | 0.299 |
| z77 | 0.000 | 0.010 | 0.527 | 0.076 | 0.343 |
| z86 | 0.123 | 0.000 | 0.000 | 0.462 | 0.000 |
| z87 | 0.067 | 0.000 | 0.013 | 0.166 | 0.000 |
|  |  |  |  |  |  |

**Data of Fig 2**

(a)

|  | A1 | A2 | A3 | B1 | B2 | B3 | C1 | C2 | C3 | D1 | D2 | D3 | E1 | E2 | E3 |
| --- | --- | --- | --- | --- | --- | --- | --- | --- | --- | --- | --- | --- | --- | --- | --- |
| z1 | 38.23 | 41.09 | 37.36 | 1.03 | 0.90 | 1.22 | 0.20 | 0.20 | 0.19 | 13.34 | 14.49 | 15.86 | 3.76 | 4.68 | 4.27 |
| z2 | 0.03 | 0.03 | 0.03 | 0.00 | 0.00 | 0.00 | 0.00 | 0.00 | 0.00 | 0.00 | 0.00 | 0.00 | 0.00 | 0.00 | 0.00 |
| z3 | 1.65 | 1.78 | 1.61 | 1.33 | 1.17 | 1.58 | 0.00 | 0.00 | 0.00 | 1.47 | 1.59 | 1.74 | 0.71 | 0.89 | 0.81 |
| z4 | 0.03 | 0.04 | 0.03 | 0.00 | 0.00 | 0.00 | 0.09 | 0.09 | 0.08 | 0.21 | 0.23 | 0.25 | 0.00 | 0.00 | 0.00 |
| z5 | 0.44 | 0.47 | 0.43 | 0.77 | 0.78 | 0.91 | 0.00 | 0.00 | 0.00 | 1.11 | 1.21 | 1.32 | 0.47 | 0.59 | 0.54 |
| z6 | 0.03 | 0.03 | 0.03 | 0.12 | 0.09 | 0.14 | 0.02 | 0.02 | 0.02 | 0.94 | 1.02 | 1.11 | 0.68 | 0.84 | 0.77 |
| z7 | 1.33 | 1.43 | 1.30 | 1.50 | 1.22 | 1.78 | 0.13 | 0.11 | 0.12 | 1.23 | 1.34 | 1.46 | 0.55 | 0.68 | 0.62 |
| z8 | 2.46 | 2.64 | 2.40 | 0.00 | 0.00 | 0.00 | 0.00 | 0.00 | 0.00 | 1.37 | 1.48 | 1.62 | 0.00 | 0.00 | 0.00 |
| z9 | 0.00 | 0.00 | 0.00 | 0.00 | 0.00 | 0.00 | 0.00 | 0.00 | 0.00 | 0.00 | 0.00 | 0.00 | 0.02 | 0.03 | 0.03 |
| z10 | 0.01 | 0.01 | 0.01 | 0.05 | 0.04 | 0.04 | 0.00 | 0.00 | 0.00 | 0.03 | 0.03 | 0.03 | 0.08 | 0.10 | 0.10 |
| z11 | 0.19 | 0.20 | 0.18 | 0.52 | 0.49 | 0.46 | 0.26 | 0.23 | 0.25 | 0.80 | 0.87 | 0.79 | 0.43 | 0.54 | 0.54 |
| z12 | 0.00 | 0.00 | 0.00 | 0.00 | 0.00 | 0.00 | 1.75 | 1.55 | 1.64 | 0.00 | 0.00 | 0.00 | 0.00 | 0.00 | 0.00 |
| z13 | 0.04 | 0.04 | 0.04 | 0.00 | 0.00 | 0.00 | 0.00 | 0.00 | 0.00 | 0.42 | 0.46 | 0.42 | 0.09 | 0.12 | 0.12 |
| z14 | 0.00 | 0.00 | 0.00 | 0.00 | 0.00 | 0.00 | 0.09 | 0.08 | 0.08 | 0.00 | 0.00 | 0.00 | 0.00 | 0.00 | 0.00 |
| z15 | 5.03 | 5.12 | 5.95 | 0.81 | 0.77 | 0.72 | 25.03 | 22.12 | 23.50 | 2.53 | 2.42 | 2.50 | 0.00 | 0.00 | 0.00 |
| z16 | 0.41 | 0.42 | 0.49 | 0.00 | 0.00 | 0.00 | 0.11 | 0.10 | 0.12 | 0.29 | 0.27 | 0.28 | 0.02 | 0.02 | 0.03 |
| z17 | 0.00 | 0.00 | 0.00 | 0.00 | 0.00 | 0.00 | 0.00 | 0.00 | 0.00 | 0.06 | 0.06 | 0.06 | 0.00 | 0.00 | 0.00 |
| z18 | 0.04 | 0.04 | 0.04 | 0.13 | 0.12 | 0.13 | 0.00 | 0.00 | 0.00 | 0.19 | 0.19 | 0.19 | 0.14 | 0.14 | 0.16 |
| z19 | 0.00 | 0.00 | 0.00 | 0.00 | 0.00 | 0.00 | 0.00 | 0.00 | 0.00 | 0.00 | 0.00 | 0.00 | 0.01 | 0.01 | 0.01 |
| z20 | 1.10 | 1.12 | 1.31 | 4.16 | 3.96 | 4.11 | 2.12 | 2.09 | 2.18 | 1.37 | 1.31 | 1.36 | 8.22 | 8.45 | 9.90 |
| z21 | 0.55 | 0.56 | 0.66 | 4.76 | 4.53 | 4.70 | 0.40 | 0.39 | 0.41 | 0.70 | 0.67 | 0.69 | 1.09 | 1.12 | 1.32 |
| z22 | 2.23 | 2.27 | 2.64 | 3.57 | 3.40 | 3.46 | 2.06 | 2.03 | 2.12 | 2.43 | 2.29 | 2.40 | 3.95 | 4.07 | 4.76 |
| z23 | 0.36 | 0.36 | 0.42 | 1.64 | 1.56 | 1.59 | 0.76 | 0.75 | 0.78 | 0.18 | 0.17 | 0.18 | 2.35 | 2.42 | 2.83 |
| z24 | 1.65 | 0.69 | 1.76 | 3.74 | 3.57 | 3.63 | 2.41 | 2.37 | 2.48 | 1.38 | 1.31 | 1.39 | 9.49 | 9.76 | 11.44 |
| z25 | 0.02 | 0.01 | 0.02 | 3.29 | 3.14 | 3.19 | 0.31 | 0.30 | 0.32 | 0.09 | 0.09 | 0.09 | 0.50 | 0.51 | 0.60 |
| z26 | 0.43 | 0.18 | 0.46 | 2.18 | 2.08 | 2.12 | 3.08 | 3.03 | 3.17 | 0.35 | 0.33 | 0.36 | 2.22 | 2.28 | 2.67 |
| z27 | 0.00 | 0.00 | 0.00 | 0.77 | 0.73 | 0.74 | 0.00 | 0.00 | 0.00 | 0.11 | 0.10 | 0.11 | 0.00 | 0.00 | 0.00 |
| z28 | 0.00 | 0.00 | 0.00 | 0.00 | 0.00 | 0.00 | 0.00 | 0.00 | 0.00 | 0.00 | 0.00 | 0.00 | 1.43 | 1.47 | 1.72 |
| z29 | 0.00 | 0.00 | 0.00 | 1.62 | 1.54 | 1.57 | 0.00 | 0.00 | 0.00 | 0.00 | 0.00 | 0.00 | 0.06 | 0.07 | 0.06 |
| z30 | 0.00 | 0.00 | 0.00 | 0.02 | 0.02 | 0.02 | 0.00 | 0.00 | 0.00 | 0.21 | 0.19 | 0.21 | 0.00 | 0.00 | 0.00 |
| z31 | 0.00 | 0.00 | 0.00 | 12.38 | 11.80 | 11.99 | 0.51 | 0.50 | 0.44 | 0.66 | 0.60 | 0.67 | 0.00 | 0.00 | 0.00 |
| z32 | 0.04 | 0.04 | 0.04 | 0.12 | 0.12 | 0.12 | 0.00 | 0.00 | 0.00 | 0.00 | 0.00 | 0.00 | 0.00 | 0.00 | 0.00 |
| z33 | 0.00 | 0.00 | 0.00 | 0.31 | 0.29 | 0.30 | 0.07 | 0.04 | 0.06 | 0.00 | 0.00 | 0.00 | 0.00 | 0.00 | 0.00 |
| z34 | 0.00 | 0.00 | 0.00 | 0.00 | 0.00 | 0.00 | 0.00 | 0.00 | 0.00 | 0.20 | 0.18 | 0.20 | 0.00 | 0.00 | 0.00 |
| z35 | 0.00 | 0.00 | 0.00 | 0.00 | 0.00 | 0.00 | 0.39 | 0.26 | 0.35 | 0.00 | 0.00 | 0.00 | 0.00 | 0.00 | 0.00 |
| z36 | 1.39 | 1.42 | 1.46 | 0.00 | 0.00 | 0.00 | 0.08 | 0.05 | 0.07 | 0.34 | 0.31 | 0.35 | 0.13 | 0.13 | 0.14 |
| z37 | 0.00 | 0.00 | 0.00 | 0.06 | 0.06 | 0.06 | 0.00 | 0.00 | 0.00 | 0.00 | 0.00 | 0.00 | 0.00 | 0.00 | 0.00 |
| z38 | 0.11 | 0.11 | 0.09 | 0.09 | 0.08 | 0.08 | 0.00 | 0.00 | 0.00 | 0.00 | 0.00 | 0.00 | 0.00 | 0.00 | 0.00 |
| z39 | 0.00 | 0.00 | 0.00 | 0.69 | 0.66 | 0.67 | 0.00 | 0.00 | 0.00 | 0.61 | 0.55 | 0.61 | 0.12 | 0.12 | 0.13 |
| z40 | 0.00 | 0.00 | 0.00 | 0.16 | 0.15 | 0.16 | 0.00 | 0.00 | 0.00 | 0.00 | 0.00 | 0.00 | 0.00 | 0.00 | 0.00 |
| z41 | 0.00 | 0.00 | 0.00 | 0.00 | 0.00 | 0.00 | 0.02 | 0.01 | 0.02 | 0.00 | 0.00 | 0.00 | 0.00 | 0.00 | 0.00 |
| z42 | 0.28 | 0.29 | 0.22 | 0.00 | 0.00 | 0.00 | 0.00 | 0.00 | 0.00 | 4.19 | 4.87 | 4.24 | 0.00 | 0.00 | 0.00 |
| z43 | 1.64 | 1.67 | 1.28 | 0.00 | 0.00 | 0.00 | 0.23 | 0.16 | 0.21 | 0.92 | 1.07 | 0.91 | 0.19 | 0.19 | 0.20 |
| z44 | 0.00 | 0.00 | 0.00 | 0.00 | 0.00 | 0.00 | 0.01 | 0.01 | 0.01 | 0.00 | 0.00 | 0.00 | 0.00 | 0.00 | 0.00 |
| z45 | 0.02 | 0.02 | 0.01 | 0.03 | 0.03 | 0.03 | 0.00 | 0.00 | 0.00 | 0.00 | 0.00 | 0.00 | 0.36 | 0.37 | 0.40 |
| z46 | 0.41 | 0.42 | 0.32 | 0.27 | 0.27 | 0.26 | 0.34 | 0.24 | 0.31 | 0.21 | 0.25 | 0.21 | 0.12 | 0.12 | 0.13 |
| z47 | 0.00 | 0.00 | 0.00 | 0.00 | 0.00 | 0.00 | 0.06 | 0.04 | 0.05 | 0.12 | 0.14 | 0.12 | 0.00 | 0.00 | 0.00 |
| z48 | 0.00 | 0.00 | 0.00 | 0.00 | 0.00 | 0.00 | 0.00 | 0.00 | 0.00 | 0.00 | 0.00 | 0.00 | 0.01 | 0.01 | 0.01 |
| z49 | 0.00 | 0.00 | 0.00 | 0.00 | 0.00 | 0.00 | 0.02 | 0.01 | 0.02 | 0.00 | 0.00 | 0.00 | 0.00 | 0.00 | 0.00 |
| z50 | 0.32 | 0.33 | 0.25 | 0.26 | 0.25 | 0.35 | 0.06 | 0.04 | 0.05 | 0.23 | 0.27 | 0.23 | 0.07 | 0.07 | 0.08 |
| z51 | 0.15 | 0.16 | 0.12 | 0.05 | 0.05 | 0.07 | 0.01 | 0.01 | 0.01 | 0.11 | 0.13 | 0.11 | 0.03 | 0.03 | 0.03 |
| z52 | 0.00 | 0.00 | 0.00 | 0.13 | 0.12 | 0.16 | 0.00 | 0.00 | 0.00 | 0.00 | 0.00 | 0.00 | 0.00 | 0.00 | 0.00 |
| z53 | 1.03 | 1.05 | 0.81 | 1.81 | 1.72 | 2.38 | 1.94 | 1.32 | 1.77 | 0.57 | 0.66 | 0.55 | 0.66 | 0.67 | 0.72 |
| z54 | 0.24 | 0.24 | 0.18 | 0.11 | 0.10 | 0.14 | 0.24 | 0.16 | 0.21 | 0.14 | 0.17 | 0.14 | 0.08 | 0.08 | 0.09 |
| z55 | 0.00 | 0.00 | 0.00 | 0.00 | 0.00 | 0.00 | 0.13 | 0.09 | 0.11 | 0.02 | 0.02 | 0.02 | 0.00 | 0.00 | 0.00 |
| z56 | 0.00 | 0.00 | 0.00 | 3.21 | 3.26 | 4.10 | 0.00 | 0.00 | 0.00 | 0.00 | 0.00 | 0.00 | 0.21 | 0.22 | 0.23 |
| z57 | 0.00 | 0.00 | 0.00 | 0.69 | 0.70 | 0.88 | 0.11 | 0.11 | 0.09 | 0.29 | 0.33 | 0.28 | 0.70 | 0.71 | 0.76 |
| z58 | 0.00 | 0.00 | 0.00 | 0.00 | 0.00 | 0.00 | 0.00 | 0.00 | 0.00 | 0.01 | 0.01 | 0.01 | 0.00 | 0.00 | 0.00 |
| z59 | 0.10 | 0.11 | 0.09 | 0.00 | 0.00 | 0.00 | 0.03 | 0.03 | 0.03 | 0.09 | 0.11 | 0.09 | 0.00 | 0.00 | 0.00 |
| z60 | 3.36 | 3.78 | 2.94 | 0.64 | 0.65 | 0.82 | 1.76 | 1.73 | 1.54 | 3.80 | 4.55 | 3.75 | 0.00 | 0.00 | 0.00 |
| z61 | 2.19 | 2.47 | 2.19 | 0.00 | 0.00 | 0.00 | 0.10 | 0.10 | 0.09 | 1.99 | 2.38 | 1.96 | 0.15 | 0.15 | 0.16 |
| z62 | 0.00 | 0.00 | 0.00 | 0.00 | 0.00 | 0.00 | 0.00 | 0.00 | 0.00 | 0.06 | 0.08 | 0.06 | 0.03 | 0.03 | 0.03 |
| z63 | 6.65 | 6.77 | 6.56 | 11.20 | 11.41 | 14.33 | 4.41 | 4.34 | 3.85 | 9.38 | 10.28 | 9.26 | 5.49 | 5.59 | 5.71 |
| z64 | 0.00 | 0.00 | 0.00 | 0.42 | 0.42 | 0.41 | 0.00 | 0.00 | 0.00 | 0.09 | 0.10 | 0.09 | 0.02 | 0.02 | 0.02 |
| z65 | 0.07 | 0.09 | 0.06 | 0.47 | 0.48 | 0.46 | 0.51 | 0.41 | 0.37 | 0.12 | 0.13 | 0.12 | 0.26 | 0.48 | 0.27 |
| z66 | 1.18 | 1.57 | 1.16 | 8.22 | 8.37 | 8.12 | 1.32 | 1.07 | 0.95 | 1.45 | 1.59 | 1.43 | 1.99 | 3.65 | 2.05 |
| z67 | 0.49 | 0.65 | 0.48 | 1.70 | 1.73 | 1.68 | 0.05 | 0.04 | 0.03 | 0.19 | 0.20 | 0.18 | 0.14 | 0.25 | 0.14 |
| z68 | 0.00 | 0.00 | 0.00 | 0.00 | 0.00 | 0.00 | 0.04 | 0.03 | 0.03 | 0.15 | 0.16 | 0.15 | 0.14 | 0.25 | 0.14 |
| z69 | 0.00 | 0.00 | 0.00 | 0.00 | 0.00 | 0.00 | 0.00 | 0.00 | 0.00 | 0.51 | 0.55 | 0.50 | 0.00 | 0.00 | 0.00 |
| z70 | 0.00 | 0.00 | 0.00 | 1.48 | 2.12 | 1.23 | 0.00 | 0.00 | 0.00 | 0.49 | 0.54 | 0.48 | 0.09 | 0.17 | 0.09 |
| z71 | 0.00 | 0.00 | 0.00 | 0.66 | 0.94 | 0.54 | 0.00 | 0.00 | 0.00 | 0.00 | 0.00 | 0.00 | 0.14 | 0.26 | 0.15 |
| z72 | 2.98 | 3.03 | 2.94 | 2.70 | 3.86 | 2.23 | 1.11 | 0.90 | 0.80 | 1.74 | 1.91 | 1.72 | 1.00 | 1.83 | 1.02 |
| z73 | 0.00 | 0.00 | 0.00 | 0.00 | 0.00 | 0.00 | 0.10 | 0.08 | 0.07 | 0.00 | 0.00 | 0.00 | 0.00 | 0.00 | 0.00 |
| z74 | 0.00 | 0.00 | 0.00 | 0.00 | 0.00 | 0.00 | 0.16 | 0.13 | 0.11 | 0.00 | 0.00 | 0.00 | 0.00 | 0.00 | 0.00 |
| z75 | 0.00 | 0.00 | 0.00 | 0.00 | 0.00 | 0.00 | 0.43 | 0.35 | 0.31 | 0.00 | 0.00 | 0.00 | 0.00 | 0.00 | 0.00 |
| z76 | 0.00 | 0.00 | 0.00 | 0.00 | 0.00 | 0.00 | 0.04 | 0.03 | 0.03 | 0.00 | 0.00 | 0.00 | 0.00 | 0.00 | 0.00 |
| z77 | 0.00 | 0.00 | 0.00 | 0.01 | 0.01 | 0.01 | 0.53 | 0.52 | 0.46 | 0.08 | 0.09 | 0.07 | 0.34 | 0.63 | 0.35 |
| z78 | 0.00 | 0.00 | 0.00 | 0.00 | 0.00 | 0.00 | 0.00 | 0.00 | 0.00 | 0.00 | 0.00 | 0.00 | 0.00 | 0.00 | 0.00 |
| z79 | 0.00 | 0.00 | 0.00 | 0.01 | 0.01 | 0.01 | 0.28 | 0.28 | 0.33 | 0.00 | 0.00 | 0.00 | 0.01 | 0.02 | 0.01 |
| z80 | 0.00 | 0.00 | 0.00 | 0.00 | 0.00 | 0.00 | 0.00 | 0.00 | 0.00 | 0.00 | 0.00 | 0.00 | 0.02 | 0.03 | 0.02 |
| z81 | 0.04 | 0.04 | 0.05 | 0.00 | 0.00 | 0.00 | 0.00 | 0.00 | 0.00 | 0.00 | 0.00 | 0.00 | 0.00 | 0.00 | 0.00 |
| z82 | 0.00 | 0.00 | 0.00 | 0.00 | 0.00 | 0.00 | 0.05 | 0.05 | 0.05 | 0.00 | 0.00 | 0.00 | 0.00 | 0.00 | 0.00 |
| z83 | 0.00 | 0.00 | 0.00 | 0.00 | 0.00 | 0.00 | 0.12 | 0.11 | 0.13 | 0.00 | 0.00 | 0.00 | 0.00 | 0.00 | 0.00 |
| z84 | 0.00 | 0.00 | 0.00 | 0.00 | 0.00 | 0.00 | 0.47 | 0.42 | 0.49 | 0.00 | 0.00 | 0.00 | 0.00 | 0.00 | 0.00 |
| z85 | 0.04 | 0.04 | 0.04 | 0.00 | 0.00 | 0.00 | 0.01 | 0.01 | 0.01 | 0.00 | 0.00 | 0.00 | 0.00 | 0.00 | 0.00 |
| z86 | 0.12 | 0.16 | 0.13 | 0.00 | 0.00 | 0.00 | 0.00 | 0.00 | 0.00 | 0.46 | 0.60 | 0.45 | 0.00 | 0.00 | 0.00 |
| z87 | 0.07 | 0.09 | 0.07 | 0.00 | 0.00 | 0.00 | 0.01 | 0.01 | 0.01 | 0.17 | 0.22 | 0.16 | 0.00 | 0.00 | 0.00 |
| z88 | 0.00 | 0.00 | 0.00 | 0.04 | 0.04 | 0.03 | 3.22 | 2.88 | 3.35 | 0.00 | 0.00 | 0.00 | 0.07 | 0.07 | 0.07 |
